# Supplementary material for: Cryo-EM and directed evolution reveal how Arabidopsis nitrilase specificity is influenced by its quaternary structure
Source: PubMed Central journal article supplement (PMC6637149; doi:10.1038/s42003-019-0505-4), 2019-07-17
Supplement: 42003_2019_505_MOESM2_ESM.pdf [file 42003_2019_505_MOESM2_ESM.pdf]

## Supplementary Figures

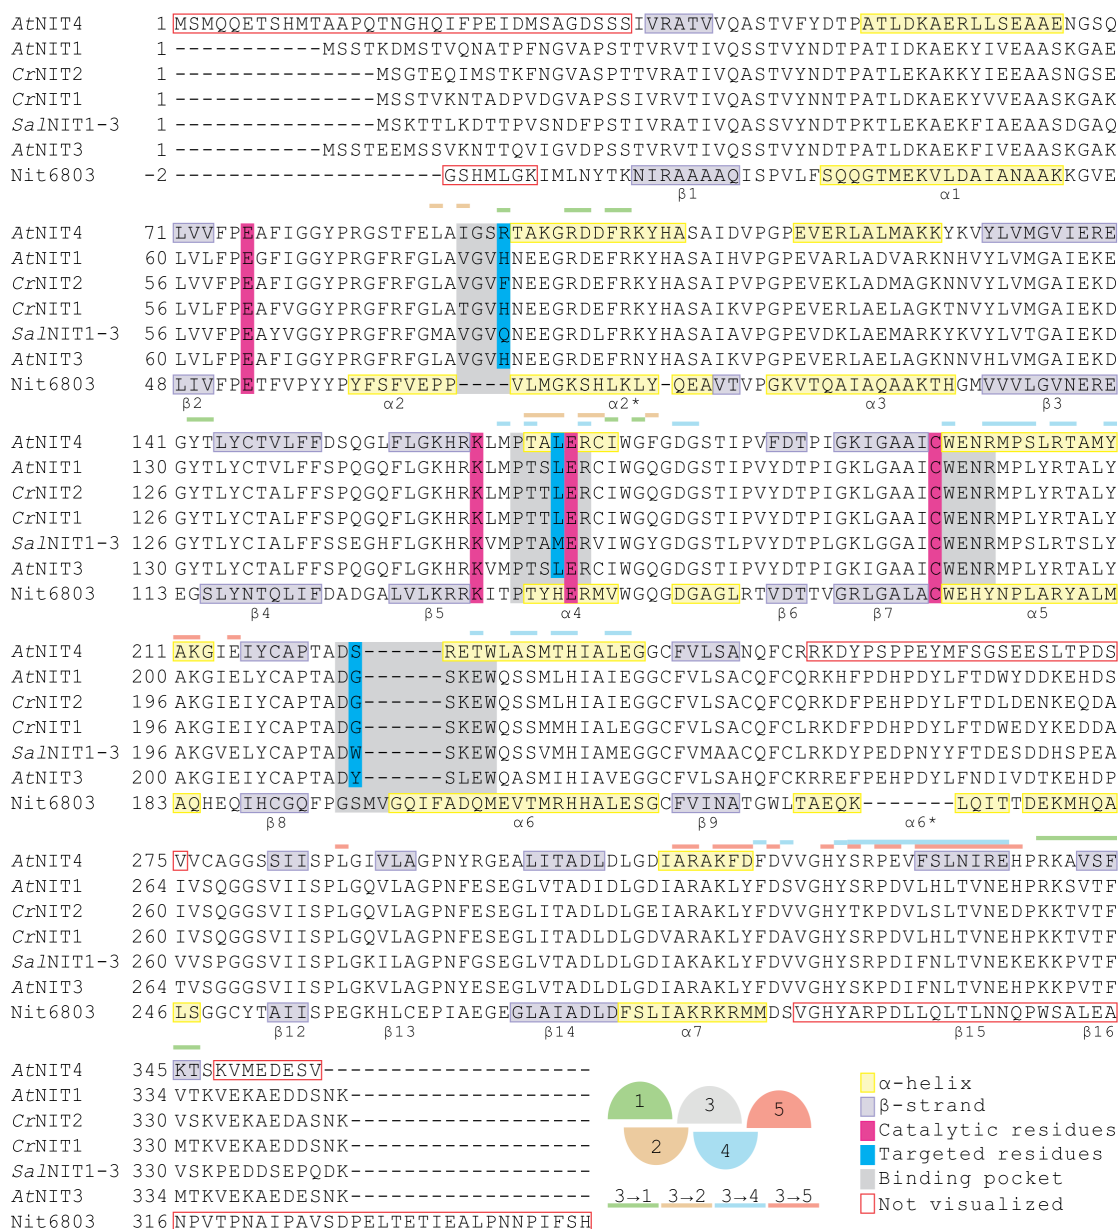

**Supplementary Figure 1. Structural sequence alignment<sup>1</sup> between NIT's relevant for this work.** β-strands and α-helices are colored purple and yellow, respectively and numbered according to Thuku et al<sup>2</sup>. Residues making up the catalytic tetrad are shown in magenta and the residues targeted here for site-saturation mutagenesis are shown in cyan. Regions forming the borders of the substrate-binding pocket are shown in gray. Helical interfaces are shown in light green, tan, light blue and orange and explained in the inset, residues not visualized in the model are outlined in red. AtNIT1, AtNIT3, AtNIT4: nitrilase 1, 3 and 4 from *Arabidopsis thaliana*; CrNIT1, CrNIT2: nitrilase 1 and 2 from *Capsella rubella*; SaNIT1-3: nitrilase 1-3 from *Sinapis alba*; Nit6803: nitrilase from *Synechocystis sp.* PCC6803 (3wuy<sup>3</sup>).

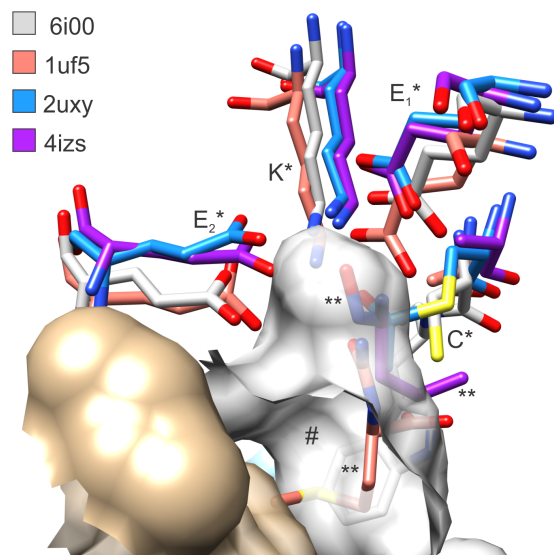

**Supplementary Figure 2. NIT4 and nitrilase superfamily members with bound substrates/ intermediates.** The positions of the CEEK catalytic tetrad residues (\*) are conserved between *At*NIT4 and other nitrilase superfamily members after structural alignment. Substrates/ substrate intermediates (\*\*) localize to the edge of the *At*NIT4 binding pocket (gray surface, #) and extend towards the lid loop (tan). The structures used were: a C171A/V236A mutant of N-carbamyl-D-amino acid amidohydrolase from *Agrobacterium sp.* KNK712 complexed with N-carbamyl-D-methionine (pdb id: 1uf5)<sup>4</sup>; an amidase from *Pseudomonas aeruginosa* with trapped acyl transfer intermediate (pdb id: 2uxy)<sup>5</sup> and a C145A mutant of the amidase from *Nesterenkonia AN1* complexed with butyramide substrate (pdb id: 4izs)<sup>6</sup>.

## Supplementary Tables

**Supplementary Table 1.** Substrate correlation scores.

| Score: $\Sigma(\text{correlated}) - \Sigma(\text{uncorrelated})$ |                        |                        |                        |                        |                        |                        |
|------------------------------------------------------------------|------------------------|------------------------|------------------------|------------------------|------------------------|------------------------|
|                                                                  | <b>P<sub>166</sub></b> | <b>T<sub>167</sub></b> | <b>A<sub>168</sub></b> | <b>L<sub>169</sub></b> | <b>E<sub>170</sub></b> | <b>R<sub>171</sub></b> |
| <b>D<sub>223</sub></b>                                           | 2                      | 2                      | 1                      | 5                      | 2                      | 2                      |
| <b>S<sub>224</sub></b>                                           | 7                      | 7                      | 6                      | <b>10</b>              | 7                      | 7                      |
| <b>R<sub>225</sub></b>                                           | 5                      | 5                      | 4                      | 8                      | 5                      | 5                      |
| <b>E<sub>226</sub></b>                                           | 3                      | 3                      | 2                      | 6                      | 3                      | 3                      |
| <b>T<sub>227</sub></b>                                           | 3                      | 3                      | 2                      | 6                      | 3                      | 3                      |

**Supplementary Table 2.** Primer sequences

| <b>Primer</b>   |                                                                                  | <b>T<sub>m</sub></b> |
|-----------------|----------------------------------------------------------------------------------|----------------------|
| R95NNS_Foward   | GGT TCT <b>NNS</b> ACC GCT AAA GCA CGA GAT GAC                                   | 68.6° -              |
| R95NNS_Reverse  | GC GGT <b>SNN</b> AGA ACC AAT AGC CAA TTC AAA GG                                 | 78.9°                |
| L169NNS_Foward  | CA GCT <b>NNS</b> GAA CGT TGC ATT TGG GGA TTT GG                                 | 69.1° -              |
| L169NNS_Reverse | CG TTC <b>SNN</b> AGC TGT AGG CAT GAG TTT GCG                                    | 77.7°                |
| S224NNS_Foward  | CT GCT GAT <b>NNS</b> AGA GAA ACT TGG CTA GCA<br>TCA ATG ACT CAT ATT GCA CTT GAG | 80.1° -              |
| S224NNS_Reverse | GC TAG CCA AGT TTC TCT <b>SNN</b> ATC AGC AGT<br>AGG TGC ACA ATA AAT CTC AAT GCC | 82.4°                |
| R95T_Foward     | GGT TCT <b>ACT</b> ACC GCT AAA GCA CGA GAT GAC                                   | 71.8°                |
| R95T_Reverse    | GC GGT <b>AGT</b> AGA ACC AAT AGC CAA TTC AAA GG                                 | 72.8°                |

**Supplementary Table 3.** Library assembly bottlenecks. The number of CFU's estimated from a 1% sample and the number required at the 95% confidence level.

|                     | <b># CFU's</b>             |                                  |                               |                               |
|---------------------|----------------------------|----------------------------------|-------------------------------|-------------------------------|
|                     | <b>Counted<sup>7</sup></b> | <b>Full coverage<sup>8</sup></b> | <b>Top mutant<sup>9</sup></b> | <b>In top ten<sup>9</sup></b> |
| <b>1 mutation</b>   | 1610 ± 790                 | 172                              | 80                            | 7                             |
| <b>2 mutations</b>  | 3400 ± 1140                | 8130                             | 2130                          | 138                           |
| <b>3 mutations</b>  | 5200 ± 1410                | 3.42×10 <sup>5</sup>             | 55500                         | 2970                          |
| <b>DH5α</b>         | 4.08×10 <sup>6</sup>       | (6.02±1.77)×10 <sup>4</sup>      | -                             | -                             |
| <b>BL21</b>         | 7.71×10 <sup>5</sup>       | (6.02±1.77)×10 <sup>4</sup>      | -                             | -                             |
| <b># Plated out</b> | 4×10 <sup>5</sup>          | -                                | -                             | -                             |

**Supplementary Table 4. Nitriles included in the selection assay.** All of the nitriles were supplied by Sigma-Aldrich with % purity shown. Those nitrile plates that produced bacterial colonies are shown followed by brackets indicating the number of colonies observed on the plate and the number of days required for visible colony growth.

| <b>Nitrile (purity, # colonies, # Days)</b>      |                                                      |
|--------------------------------------------------|------------------------------------------------------|
| <b><i>Saturated aliphatic mononitriles</i></b>   | <b><i>Benzene derivatives</i></b>                    |
| Potassium Cyanide $\geq 98\%$ (1, 9)             | Benzonitrile 99.9%                                   |
| Acetonitrile 97%                                 | Phenylacetoneitrile 98%                              |
| Propanenitrile 99% (7, 2)                        | 3-Phenylpropionitrile 99%                            |
| Butanenitrile $\geq 99\%$ (92, 2)                | 4-phenylbutyronitrile 99%                            |
| Pentanenitrile 99.5%                             | Mandelonitrile 97%                                   |
| Octanenitrile 97%                                | 3-Hydroxy-3-phenylpropionitrile ?%                   |
| Nonanenitrile 98%                                | 2-Amino-2-phenylacetoneitrile 98%                    |
| Dodecanenitrile 99% (150, 13)                    | <b><i>Aryl nitriles</i></b>                          |
| Fluoroacetoneitrile 98% (300, 2)                 | 4-hydroxyphenylacetoneitrile 98%                     |
| <b><i>Unsaturated aliphatic mononitriles</i></b> | 3- Cyanophenol 99%                                   |
| Acrylonitrile 99.5% (20, 9)                      | p-Tolunitrile 98%                                    |
| 3-Butenenitrile 98% (43, 13)                     | o-Tolunitrile $\geq 97\%$ (1, 13)                    |
| 4-Pentenenitrile 97% (4, 9)                      | m-Tolunitrile 99%                                    |
| 6-Heptenenitrile 98% (5, 9)                      | 2-Nitrobenzonitrile $\geq 99\%$                      |
| <b><i>Branched aliphatic mononitriles</i></b>    | 3-Nitrobenzonitrile 98%                              |
| Isovaleronitrile 98% (3, 4)                      | 3-Aminobenzonitrile 99%                              |
| $\beta$ -cyano-L-alanine 95%                     | 3,5 Dibromo-4-hydroxybenzonitrile (Bromoxynil) 99.6% |
| <b><i>Saturated aliphatic dinitriles</i></b>     | 3-Chlorobenzonitrile 99%                             |
| Malononitrile $\geq 99\%$                        | 4-Chlorobenzonitrile 99%                             |
| Adiponitrile 99% (22, 2)                         | <b><i>Unsaturated aliphatic dinitriles</i></b>       |
| <b><i>Heterocyclic compounds</i></b>             | Crotonitrile 99%                                     |
| 2 – Furonitrile 99%                              | Fumaronitrile 98%                                    |
| 2-Cyanopyridine 99% (1, 9)                       | <b><i>Aromatic dinitriles</i></b>                    |
| 3-Cyanopyridine 98% (25, 13)                     | Benzylidenemalononitrile 98%                         |
| 4 Cyanopyridine 98% (300, 2)                     | 1,4-dicyanobenzene 98%                               |

**Supplementary Table 5.** Substrate profiles of AtNIT4 and AtNIT4 R95T L169A S224Q. The data show means  $\pm$  standard deviation (n = 3) n.d.: not detectable

| <b>Substrate</b>         | <b>Specific enzyme activity [nkat.(mg protein)<sup>-1</sup>]</b> |                                |
|--------------------------|------------------------------------------------------------------|--------------------------------|
|                          | <b>AtNIT4</b>                                                    | <b>AtNIT4 R95T L169A S224Q</b> |
| Fumaronitrile            | n.d.                                                             | n.d.                           |
| 4-cyanopyridine          | n.d.                                                             | 27.24 $\pm$ 1.01               |
| Fluoroacetoneitrile      | n.d.                                                             | 34.31 $\pm$ 4.88               |
| 2-furonitrile            | n.d.                                                             | 232.89 $\pm$ 6.82              |
| 2-cyanopyridine          | n.d.                                                             | 340.58 $\pm$ 18.63             |
| Potassium cyanide        | n.d.                                                             | 378.56 $\pm$ 19.37             |
| $\beta$ -cyano-L-alanine | 314.16 $\pm$ 71.52                                               | n.d.                           |

### Supplementary references

1. Meng, E. C., Pettersen, E. F., Couch, G. S., Huang, C. C. & Ferrin, T. E. Tools for integrated sequence-structure analysis with UCSF Chimera. *BMC Bioinformatics* **7**, 1–10 (2006).
2. Thuku, R. N., Brady, D., Benedik, M. J. & Sewell, B. T. Microbial nitrilases: versatile, spiral forming, industrial enzymes. *J. Appl. Microbiol.* **106**, 703–27 (2009).
3. Zhang, L. *et al.* Structural insights into enzymatic activity and substrate specificity determination by a single amino acid in nitrilase from *Syechocystis* sp. PCC6803. *J. Struct. Biol.* **188**, 93–101 (2014).
4. Hashimoto, H. *et al.* Crystal Structure of C171A/V236A mutant of N-carbamyl-D-amino acid amidohydrolase. *RCSB Protein Data Bank* (2003). doi:10.2210/pdb1uf5/pdb
5. Andrade, J., Karmali, A., Carrondo, M. a & Frazão, C. Structure of amidase from *Pseudomonas aeruginosa* showing a trapped acyl transfer reaction intermediate state. *J. Biol. Chem.* **282**, 19598–605 (2007).
6. Kimani, S. W., Hunter, R., Vlok, M., Watermeyer, J. & Sewell, B. T. Covalent modifications of the active site cysteine occur as a result of mutating the glutamate of the catalytic triad in the amidase from *Nesterenkonia* sp. *RCSB Protein Data Bank* (2013). doi:10.2210/pdb4izs/pdb
7. Abbott, J. H. & Rosenblatt, J. I. Two stage estimation with one observation on the first stage. *Ann. Inst. Stat. Math.* **14**, 229–235 (1962).
8. Denault, M. & Pelletier, J. N. Protein Library Design and Screening BT - Protein Engineering Protocols. in (eds. Arndt, K. M. & Müller, K. M.) 127–154 (Humana Press, 2007). doi:10.1385/1-59745-187-8:127
9. Nov, Y. When second best is good enough: Another probabilistic look at saturation mutagenesis. *Appl. Environ. Microbiol.* **78**, 258–262 (2012).
